# Supplementary material for: Brimonidine-LAPONITE® intravitreal formulation has an ocular hypotensive and neuroprotective effect throughout 6 months of follow-up in a glaucoma animal model
Source: Royal Society of Chemistry journal article supplement (doi:10.1039/d0bm01013h), 2020-01-01
Supplement: d0bm01013h1.pdf [file d0bm01013h1.pdf]

| OCT PARAMETERS | BASELINE       | 3 d            |       |      | 2 w            |       |      | 4 w            |        |      | 6 w            |       |      | 8 w            |       |      | 12 w           |        |      | 24 w           |        |      |
|----------------|----------------|----------------|-------|------|----------------|-------|------|----------------|--------|------|----------------|-------|------|----------------|-------|------|----------------|--------|------|----------------|--------|------|
|                |                | Mean ± SD      | %Ch   | p    | Mean ± SD      | %Ch   | p    | Mean ± SD      | %Ch    | p    | Mean ± SD      | %Ch   | p    | Mean ± SD      | %Ch   | p    | Mean ± SD      | %Ch    | p    | Mean ± SD      | %Ch    | p    |
| CENTRAL        | 274.52 ± 14.97 | 303.60 ± 22.78 | 10.59 | 0.07 | 284.79 ± 25.79 | 3.74  | 0.21 | 266.62 ± 21.03 | -2.88  | 0.45 | 295.00 ± 10.29 | 7.46  | 0.01 | 278.00 ± 23.63 | 1.27  | 0.46 | 247.67 ± 18.61 | -9.78  | 0.27 | 259.40 ± 15.27 | -5.51  | 0.60 |
|                | 281.13 ± 14.07 | 276.40 ± 19.16 | -1.67 |      | 277.56 ± 22.06 | -1.26 |      | 271.19 ± 21.80 | -3.53  |      | 269.60 ± 11.86 | -4.09 |      | 269.50 ± 24.02 | -4.13 |      | 273.33 ± 32.62 | -2.77  |      | 266.00 ± 27.45 | -5.38  |      |
| INNER INFERIOR | 260.16 ± 15.09 | 273.40 ± 14.92 | 5.09  | 0.18 | 262.85 ± 18.42 | 1.01  | 0.02 | 256.24 ± 10.77 | -1.51  | 0.76 | 270.20 ± 14.67 | 3.86  | 0.20 | 259.11 ± 11.33 | -0.40 | 0.34 | 249.67 ± 5.85  | -4.03  | 0.27 | 256.60 ± 14.63 | -1.37  | 0.46 |
|                | 262.35 ± 9.02  | 261.60 ± 10.59 | -0.28 |      | 254.36 ± 10.48 | -3.04 |      | 255.33 ± 11.11 | -2.68  |      | 261.00 ± 16.31 | -0.51 |      | 253.18 ± 12.75 | -3.50 |      | 258.00 ± 13.00 | -1.66  |      | 250.80 ± 14.95 | -4.40  |      |
| OUTER INFERIOR | 251.68 ± 9.47  | 259.60 ± 10.85 | 3.14  | 0.11 | 253.91 ± 16.81 | 0.88  | 0.07 | 247.67 ± 9.37  | -1.59  | 0.86 | 252.80 ± 9.33  | 0.45  | 0.53 | 250.11 ± 10.25 | -0.23 | 0.73 | 242.00 ± 6.55  | -3.85  | 0.27 | 241.20 ± 8.16  | -4.16  | 0.53 |
|                | 253.10 ± 8.16  | 250.20 ± 4.65  | -1.14 |      | 248.28 ± 8.49  | -1.90 |      | 248.78 ± 8.89  | -1.71  |      | 248.80 ± 13.00 | -1.70 |      | 248.27 ± 9.32  | -4.11 |      | 248.00 ± 5.56  | -2.02  |      | 240.20 ± 6.45  | -5.10  |      |
| INNER SUPERIOR | 253.84 ± 9.723 | 267.80 ± 10.89 | 5.50  | 0.08 | 255.16 ± 19.27 | 0.52  | 0.64 | 245.62 ± 13.20 | -3.24  | 0.28 | 264.40 ± 6.95  | 4.16  | 0.04 | 243.00 ± 10.07 | -4.27 | 0.13 | 235.33 ± 2.08  | -7.29  | 0.05 | 238.60 ± 4.93  | -6.00  | 0.67 |
|                | 256.03 ± 9.73  | 256.00 ± 8.15  | -0.01 |      | 253.34 ± 12.42 | -1.05 |      | 248.78 ± 9.43  | -2.83  |      | 248.60 ± 14.43 | -2.90 |      | 251.90 ± 12.54 | -1.61 |      | 249.00 ± 10.58 | -2.75  |      | 236.80 ± 12.43 | -7.51  |      |
| OUTER SUPERIOR | 255.81 ± 7.58  | 262.40 ± 6.42  | 2.57  | 0.15 | 254.44 ± 14.58 | -0.53 | 0.73 | 246.70 ± 10.94 | -3.56  | 0.14 | 258.00 ± 6.20  | 0.86  | 0.29 | 246.25 ± 12.95 | -3.74 | 0.19 | 243.67 ± 4.72  | -4.75  | 0.18 | 244.80 ± 3.96  | -4.30  | 1.00 |
|                | 257.13 ± 9.35  | 256.20 ± 6.05  | -0.36 |      | 255.46 ± 9.91  | -0.65 |      | 251.08 ± 9.17  | -2.35  |      | 252.20 ± 10.30 | -1.92 |      | 254.50 ± 11.25 | -1.02 |      | 251.67 ± 6.42  | -2.12  |      | 241.40 ± 9.45  | -6.12  |      |
| INNER NASAL    | 256.77 ± 10.69 | 272.20 ± 10.68 | 6.01  | 0.03 | 258.21 ± 15.89 | 0.56  | 0.17 | 248.05 ± 10.66 | -3.40  | 0.15 | 266.00 ± 9.67  | 3.59  | 0.75 | 251.44 ± 13.72 | -2.08 | 0.56 | 245.00 ± 8.54  | -4.58  | 0.65 | 243.40 ± 6.189 | -5.21  | 0.20 |
|                | 259.52 ± 9.16  | 257.80 ± 7.12  | -0.66 |      | 253.67 ± 11.61 | -2.25 |      | 252.96 ± 8.68  | -2.53  |      | 263.80 ± 3.49  | 1.65  |      | 254.00 ± 8.69  | -2.13 |      | 249.00 ± 5.29  | -4.05  |      | 250.80 ± 10.75 | -3.36  |      |
| OUTER NASAL    | 252.06 ± 7.68  | 261.00 ± 8.74  | 3.54  | 0.05 | 252.48 ± 11.66 | 0.17  | 0.41 | 247.71 ± 12.13 | -1.72  | 0.29 | 255.00 ± 9.61  | 1.17  | 0.52 | 249.00 ± 10.95 | -1.21 | 0.69 | 251.00 ± 10.44 | -0.42  | 0.51 | 240.40 ± 4.66  | -4.63  | 0.67 |
|                | 254.35 ± 8.51  | 251.20 ± 3.83  | -1.24 |      | 250.22 ± 11.28 | -1.62 |      | 249.73 ± 8.31  | -1.82  |      | 251.60 ± 4.61  | -1.08 |      | 252.78 ± 11.69 | -0.62 |      | 251.00 ± 3.60  | -1.32  |      | 241.80 ± 3.83  | -4.93  |      |
| INNER TEMPORAL | 255.97 ± 10.97 | 270.20 ± 13.36 | 5.56  | 0.18 | 255.76 ± 24.14 | -0.08 | 0.20 | 256.90 ± 31.49 | 0.36   | 0.05 | 265.80 ± 12.00 | 3.84  | 0.11 | 250.67 ± 12.70 | -2.07 | 0.90 | 241.67 ± 7.50  | -5.59  | 0.12 | 250.20 ± 5.80  | -2.25  | 0.05 |
|                | 257.42 ± 9.31  | 257.80 ± 13.38 | 0.14  |      | 249.89 ± 12.30 | -2.92 |      | 246.56 ± 8.91  | -4.22  |      | 252.20 ± 14.29 | -2.03 |      | 248.20 ± 12.59 | -3.58 |      | 251.33 ± 7.23  | -2.37  |      | 239.20 ± 9.68  | -7.08  |      |
| OUTER TEMPORAL | 253.87 ± 9.33  | 259.80 ± 8.16  | 2.33  | 0.20 | 253.70 ± 12.76 | -0.06 | 0.86 | 249.67 ± 16.93 | -1.65  | 0.23 | 255.00 ± 7.31  | 0.45  | 0.46 | 247.78 ± 9.71  | -2.40 | 0.22 | 243.67 ± 4.72  | -4.02  | 0.12 | 243.60 ± 4.98  | -4.05  | 0.83 |
|                | 254.39 ± 8.68  | 253.80 ± 5.45  | -0.23 |      | 253.22 ± 9.94  | -0.46 |      | 252.26 ± 8.17  | -0.84  |      | 249.60 ± 6.18  | -1.88 |      | 253.80 ± 8.89  | -0.23 |      | 252.67 ± 4.93  | -0.68  |      | 245.60 ± 9.18  | -3.46  |      |
| TOTAL VOLUME   | 1.96 ± 0.08    | 2.00 ± 0.07    | 2.04  | 0.20 | 1.82 ± 0.10    | -7.14 | 0.27 | 1.76 ± 0.08    | -10.20 | 0.19 | 1.86 ± 0.05    | -5.10 | 0.24 | 1.77 ± 0.06    | -9.69 | 0.85 | 1.72 ± 0.03    | -12.24 | 0.27 | 1.73 ± 0.03    | -11.73 | 0.67 |

RETINAL THICKNESS

|                |                   |               |               |       |             |               |        |             |               |        |             |               |        |             |               |        |             |               |        |             |               |        |      |
|----------------|-------------------|---------------|---------------|-------|-------------|---------------|--------|-------------|---------------|--------|-------------|---------------|--------|-------------|---------------|--------|-------------|---------------|--------|-------------|---------------|--------|------|
|                | 1.97 ± 0.06       | 2.00 ± 0.07   | 1.52          |       | 1.80 ± 0.07 | -8.63         |        | 1.78 ± 0.07 | -9.64         |        | 1.80 ± 0.06 | -8.63         |        | 1.76 ± 0.11 | -10.66        |        | 1.79 ± 0.05 | -9.14         |        | 1.73 ± 0.06 | -12.18        |        |      |
| RNFL THICKNESS | GLOBAL            | 46.97 ± 6.30  | 52.60 ± 6.80  | 11.99 | 0.22        | 49.66 ± 11.63 | 5.73   | 0.02        | 44.20 ± 7.83  | -5.90  | 0.91        | 48.80 ± 11.38 | 3.90   | 0.62        | 48.88 ± 11.99 | 4.07   | 0.30        | 45.67 ± 2.51  | -2.77  | 0.26        | 43.00 ± 9.00  | -8.45  | 0.91 |
|                |                   | 47.68 ± 3.28  | 47.80 ± 4.43  | 0.25  |             | 44.56 ± 5.53  | -6.54  |             | 44.08 ± 4.51  | -7.55  |             | 45.00 ± 7.07  | -5.62  |             | 42.90 ± 8.37  | -10.03 |             | 43.67 ± 2.88  | -8.41  |             | 41.00 ± 5.09  | -14.01 |      |
|                | INFERIOR TEMPORAL | 47.87 ± 11.60 | 51.20 ± 6.30  | 6.95  | 0.15        | 51.56 ± 15.04 | 7.71   | 0.02        | 52.05 ± 11.24 | 8.73   | 0.00        | 36.20 ± 15.30 | -24.38 | 0.22        | 54.43 ± 13.60 | 13.70  | 0.07        | 49.67 ± 5.68  | 3.76   | 0.18        | 45.40 ± 5.81  | -5.16  | 0.29 |
|                |                   | 51.26 ± 9.81  | 56.00 ± 2.55  | 9.25  |             | 44.53 ± 8.76  | -13.13 |             | 43.19 ± 8.73  | -15.74 |             | 47.75 ± 10.65 | -6.85  |             | 43.30 ± 10.13 | -15.53 |             | 44.33 ± 3.05  | -13.52 |             | 43.20 ± 10.23 | -15.72 |      |
|                | INFERIOR NASAL    | 49.81 ± 11.23 | 47.00 ± 8.45  | -5.64 | 0.37        | 52.22 ± 16.06 | 4.84   | 0.22        | 53.45 ± 11.78 | 7.31   | 0.48        | 35.20 ± 13.02 | -29.33 | 0.14        | 56.25 ± 9.45  | 12.93  | 0.16        | 56.67 ± 13.65 | 13.77  | 0.51        | 45.00 ± 10.07 | -9.66  | 0.52 |
|                |                   | 52.45 ± 6.94  | 51.00 ± 4.52  | -2.76 |             | 48.39 ± 8.87  | -7.74  |             | 51.77 ± 11.41 | -1.30  |             | 47.50 ± 9.25  | -9.44  |             | 47.30 ± 11.51 | -9.82  |             | 52.33 ± 2.08  | -0.23  |             | 47.80 ± 8.31  | -8.87  |      |
|                | SUPERIOR TEMPORAL | 49.48 ± 11.07 | 62.80 ± 15.12 | 26.92 | 0.09        | 48.41 ± 17.33 | -2.16  | 0.57        | 35.35 ± 15.05 | -28.56 | 0.01        | 64.40 ± 22.78 | 30.15  | 0.05        | 36.62 ± 10.62 | -25.99 | 0.13        | 41.67 ± 17.78 | -15.78 | 0.51        | 41.20 ± 17.13 | -16.73 | 0.75 |
|                |                   | 49.84 ± 9.69  | 48.00 ± 8.09  | -3.69 |             | 46.36 ± 12.51 | -6.98  |             | 44.92 ± 8.58  | -9.87  |             | 40.00 ± 9.05  | -19.74 |             | 45.10 ± 13.37 | -9.51  |             | 42.00 ± 3.60  | -15.73 |             | 40.00 ± 8.57  | -19.74 |      |
|                | SUPERIOR NASAL    | 40.48 ± 8.69  | 49.20 ± 7.69  | 21.54 | 0.01        | 41.72 ± 15.08 | 3.06   | 0.50        | 31.50 ± 14.00 | -22.18 | 0.12        | 45.80 ± 7.46  | 13.14  | 0.01        | 35.50 ± 13.69 | -12.30 | 0.45        | 29.33 ± 18.23 | -27.54 | 0.37        | 33.80 ± 12.57 | -16.50 | 0.75 |
|                |                   | 38.32 ± 9.27  | 35.60 ± 6.73  | -7.10 |             | 39.61 ± 10.41 | 3.37   |             | 37.96 ± 9.71  | -0.94  |             | 28.25 ± 6.23  | -26.28 |             | 40.20 ± 12.34 | 4.91   |             | 39.00 ± 8.88  | 1.77   |             | 34.60 ± 10.55 | -9.71  |      |
|                | NASAL             | 45.26 ± 8.44  | 48.20 ± 10.94 | 6.49  | 0.26        | 46.22 ± 13.39 | 2.12   | 0.12        | 43.50 ± 9.76  | -3.89  | 0.89        | 37.40 ± 4.50  | -17.37 | 0.26        | 45.13 ± 10.19 | -0.29  | 0.37        | 46.00 ± 5.19  | 1.63   | 0.65        | 43.20 ± 10.47 | -4.55  | 0.75 |
|                |                   | 43.26 ± 7.69  | 41.80 ± 4.65  | -3.37 |             | 41.92 ± 8.21  | -3.10  |             | 44.88 ± 11.87 | 3.74   |             | 41.00 ± 6.32  | -5.22  |             | 40.40 ± 10.90 | -6.61  |             | 42.67 ± 8.32  | -1.36  |             | 39.20 ± 10.13 | -9.39  |      |
|                | TEMPORAL          | 48.84 ± 9.75  | 56.40 ± 6.95  | 15.48 | 0.73        | 53.19 ± 12.20 | 8.91   | 0.01        | 47.10 ± 11.15 | -3.56  | 0.19        | 67.20 ± 26.16 | 37.59  | 0.38        | 55.75 ± 20.56 | 14.15  | 0.19        | 48.00 ± 3.00  | -1.72  | 0.12        | 46.40 ± 7.19  | -5.00  | 0.24 |
|                |                   | 51.74 ± 8.51  | 54.60 ± 8.84  | 5.53  |             | 46.19 ± 11.26 | -10.73 |             | 42.58 ± 10.59 | -17.70 |             | 56.75 ± 22.09 | 9.68   |             | 42.80 ± 15.54 | -17.28 |             | 44.00 ± 2.00  | -14.96 |             | 41.60 ± 9.47  | -19.60 |      |
| GCL THICKNESS  | CENTRAL           | 22.13 ± 2.70  | 23.80 ± 2.58  | 7.54  | 0.42        | 20.03 ± 3.33  | -9.49  | 0.49        | 18.57 ± 2.67  | -16.09 | 0.47        | 25.00 ± 4.52  | 12.97  | 0.17        | 18.67 ± 3.12  | -15.63 | 0.86        | 17.00 ± 2.64  | -23.18 | 0.37        | 17.20 ± 1.92  | -22.28 | 0.75 |
|                |                   | 22.65 ± 2.19  | 22.20 ± 3.34  | -1.98 |             | 19.47 ± 3.43  | -14.04 |             | 18.00 ± 3.06  | -20.53 |             | 21.00 ± 3.46  | -7.28  |             | 19.00 ± 4.02  | -16.11 |             | 18.67 ± 1.52  | -17.57 |             | 17.80 ± 3.27  | -21.41 |      |
|                | INNER INFERIOR    | 28.16 ± 2.36  | 29.80 ± 2.28  | 5.82  | 0.21        | 25.59 ± 2.97  | -9.13  | 0.14        | 24.57 ± 3.64  | -12.75 | 0.80        | 29.80 ± 2.16  | 5.82   | 0.24        | 23.89 ± 2.31  | -15.16 | 0.72        | 24.67 ± 0.57  | -12.39 | 0.81        | 25.60 ± 1.67  | -9.09  | 0.74 |
|                |                   | 27.45 ± 1.80  | 27.60 ± 2.88  | 0.55  |             | 24.61 ± 2.58  | -10.35 |             | 24.96 ± 2.71  | -9.07  |             | 28.20 ± 1.92  | 2.73   |             | 24.36 ± 1.43  | -11.26 |             | 24.67 ± 1.52  | -10.13 |             | 26.20 ± 1.09  | -4.55  |      |
|                | OUTER INFERIOR    | 26.61 ± 1.72  | 26.60 ± 0.54  | -0.04 | 0.76        | 24.47 ± 2.33  | -8.04  | 0.57        | 24.05 ± 2.81  | -9.62  | 0.16        | 27.00 ± 1.73  | 1.47   | 0.27        | 24.22 ± 2.38  | -8.98  | 0.78        | 22.33 ± 1.52  | -16.08 | 0.04        | 24.20 ± 1.92  | -9.06  | 0.33 |
|                |                   | 26.77 ± 1.49  | 26.80 ± 1.30  | 0.11  |             | 24.78 ± 2.19  | -7.43  |             | 24.85 ± 1.87  | -7.17  |             | 26.00 ± 1.22  | -2.88  |             | 24.45 ± 2.42  | -8.67  |             | 25.67 ± 0.57  | -4.11  |             | 23.80 ± 0.83  | -11.09 |      |

|                |              |              |        |              |        |              |        |              |        |              |        |              |        |              |        |
|----------------|--------------|--------------|--------|--------------|--------|--------------|--------|--------------|--------|--------------|--------|--------------|--------|--------------|--------|
| INNER SUPERIOR | 26.45 ± 1.71 | 25.80 ± 3.96 | -2.46  | 23.34 ± 3.71 | -11.75 | 20.76 ± 3.17 | -21.51 | 27.20 ± 2.38 | 2.84   | 21.50 ± 2.39 | -18.71 | 21.33 ± 0.57 | -19.36 | 20.80 ± 2.49 | -21.36 |
|                | 0.64         | 0.33         | 0.15   | 0.09         | 0.44   | 0.10         | 0.59   | 0.44         | 0.10   | 0.59         | 0.44   | 0.10         | 0.59   | 0.44         | 0.10   |
| OUTER SUPERIOR | 26.42 ± 1.62 | 26.80 ± 2.38 | 1.51   | 29.20 ± 3.72 | 10.61  | 22.30 ± 2.61 | -15.53 | 22.80 ± 4.32 | -13.64 | 20.90 ± 3.69 | -20.83 | 20.00 ± 1.00 | -24.24 | 20.20 ± 2.77 | -23.48 |
|                | 0.09         | 0.60         | 0.08   | 0.59         | 0.59   | 0.82         | 0.40   | 0.59         | 0.59   | 0.82         | 0.40   | 0.59         | 0.59   | 0.82         | 0.40   |
| INNER NASAL    | 25.74 ± 1.98 | 27.40 ± 0.89 | 6.45   | 23.69 ± 3.17 | -7.96  | 21.70 ± 3.32 | -15.70 | 26.40 ± 1.14 | 2.56   | 22.88 ± 2.10 | -11.11 | 22.67 ± 1.15 | -11.93 | 24.40 ± 3.50 | -5.21  |
|                | 0.09         | 0.60         | 0.08   | 0.59         | 0.59   | 0.82         | 0.40   | 0.59         | 0.59   | 0.82         | 0.40   | 0.59         | 0.59   | 0.82         | 0.40   |
| OUTER NASAL    | 25.32 ± 2.08 | 26.20 ± 1.09 | 3.47   | 23.31 ± 2.77 | -7.94  | 23.58 ± 2.31 | -6.87  | 25.80 ± 1.78 | 1.90   | 22.10 ± 3.24 | -12.72 | 22.33 ± 1.15 | -11.81 | 22.20 ± 4.08 | -12.32 |
|                | 0.09         | 0.60         | 0.08   | 0.59         | 0.59   | 0.82         | 0.40   | 0.59         | 0.59   | 0.82         | 0.40   | 0.59         | 0.59   | 0.82         | 0.40   |
| INNER NASAL    | 25.65 ± 2.61 | 22.60 ± 4.15 | -11.89 | 21.64 ± 4.22 | -15.63 | 22.48 ± 2.82 | -12.36 | 25.00 ± 3.00 | -2.53  | 22.44 ± 3.74 | -12.51 | 21.00 ± 2.64 | -18.13 | 23.00 ± 1.58 | -10.33 |
|                | 0.42         | 0.12         | 0.36   | 0.91         | 0.65   | 0.26         | 0.75   | 0.65         | 0.26   | 0.75         | 0.65   | 0.26         | 0.75   | 0.65         | 0.26   |
| OUTER NASAL    | 25.65 ± 2.13 | 24.60 ± 3.28 | -4.09  | 23.08 ± 3.42 | -10.02 | 23.33 ± 2.85 | -9.04  | 25.20 ± 2.28 | -1.75  | 23.50 ± 1.78 | -8.38  | 23.00 ± 1.00 | -10.33 | 22.40 ± 2.30 | -12.67 |
|                | 0.42         | 0.12         | 0.36   | 0.91         | 0.65   | 0.26         | 0.75   | 0.65         | 0.26   | 0.75         | 0.65   | 0.26         | 0.75   | 0.65         | 0.26   |
| INNER TEMPORAL | 26.00 ± 2.25 | 23.60 ± 4.15 | -9.23  | 22.06 ± 3.11 | -15.15 | 23.48 ± 2.90 | -9.69  | 25.60 ± 2.07 | -1.54  | 24.00 ± 2.23 | -7.69  | 22.67 ± 3.21 | -12.81 | 23.40 ± 1.34 | -10.00 |
|                | 0.49         | 0.02         | 0.15   | 0.39         | 0.59   | 0.50         | 0.82   | 0.59         | 0.50   | 0.82         | 0.50   | 0.82         | 0.50   | 0.82         | 0.82   |
| OUTER TEMPORAL | 26.45 ± 1.76 | 25.00 ± 1.22 | -5.48  | 23.75 ± 3.11 | -10.21 | 24.38 ± 2.31 | -7.83  | 24.40 ± 2.70 | -7.75  | 23.56 ± 1.74 | -10.93 | 22.67 ± 0.57 | -14.29 | 22.80 ± 2.38 | -13.80 |
|                | 0.49         | 0.02         | 0.15   | 0.39         | 0.59   | 0.50         | 0.82   | 0.59         | 0.50   | 0.82         | 0.50   | 0.82         | 0.50   | 0.82         | 0.82   |
| INNER TEMPORAL | 25.68 ± 3.93 | 24.00 ± 2.12 | -6.54  | 22.12 ± 3.96 | -13.86 | 22.19 ± 3.57 | -13.59 | 24.20 ± 2.95 | -5.76  | 21.78 ± 3.23 | -15.19 | 25.00 ± 3.60 | -2.65  | 21.80 ± 1.92 | -15.11 |
|                | 0.65         | 0.53         | 0.49   | 0.58         | 0.48   | 0.37         | 0.59   | 0.48         | 0.37   | 0.59         | 0.48   | 0.37         | 0.59   | 0.48         | 0.37   |
| OUTER TEMPORAL | 25.61 ± 2.20 | 25.00 ± 4.35 | -2.38  | 21.56 ± 3.53 | -15.81 | 23.00 ± 2.64 | -10.19 | 25.20 ± 2.68 | -1.60  | 22.10 ± 4.63 | -13.71 | 22.33 ± 2.08 | -12.81 | 22.60 ± 2.07 | -11.75 |
|                | 0.65         | 0.53         | 0.49   | 0.58         | 0.48   | 0.37         | 0.59   | 0.48         | 0.37   | 0.59         | 0.48   | 0.37         | 0.59   | 0.48         | 0.37   |
| TOTAL VOLUME   | 26.61 ± 2.90 | 24.40 ± 2.96 | -8.30  | 23.36 ± 3.01 | -12.21 | 23.24 ± 2.87 | -12.66 | 24.40 ± 3.20 | -8.31  | 23.22 ± 2.33 | -12.74 | 25.67 ± 4.04 | -3.53  | 24.80 ± 1.78 | -6.80  |
|                | 0.21         | 0.81         | 0.03   | 0.34         | 0.48   | 1.00         | 0.38   | 0.48         | 1.00   | 0.38         | 0.48   | 1.00         | 0.38   | 0.48         | 0.38   |
| TOTAL VOLUME   | 27.03 ± 2.16 | 26.60 ± 2.07 | -1.59  | 23.06 ± 3.78 | -14.69 | 25.07 ± 2.12 | -7.25  | 26.20 ± 2.28 | -3.07  | 23.50 ± 4.50 | -13.06 | 25.00 ± 0.00 | -7.51  | 23.80 ± 1.92 | -11.95 |
|                | 0.21         | 0.81         | 0.03   | 0.34         | 0.48   | 1.00         | 0.38   | 0.48         | 1.00   | 0.38         | 0.48   | 1.00         | 0.38   | 0.48         | 0.38   |
| TOTAL VOLUME   | 0.18 ± 0.01  | 0.18 ± 0.01  | 0      | 0.16 ± 0.01  | -11.11 | 0.15 ± 0.01  | -16.67 | 0.18 ± 0.01  | 0.00   | 0.16 ± 0.01  | -11.11 | 0.16 ± 0.01  | -11.11 | 0.16 ± 0.01  | -11.11 |
|                | 0.55         | 0.53         | 0.13   | 0.74         | 0.92   | 0.63         | 0.65   | 0.92         | 0.63   | 0.65         | 0.92   | 0.63         | 0.65   | 0.92         | 0.65   |
| TOTAL VOLUME   | 0.18 ± 0.00  | 0.18 ± 0.01  | 0      | 0.16 ± 0.01  | -11.11 | 0.16 ± 0.01  | -11.11 | 0.17 ± 0.00  | -5.56  | 0.15 ± 0.01  | -16.67 | 0.16 ± 0.00  | -11.11 | 0.15 ± 0.01  | -16.67 |
|                | 0.55         | 0.53         | 0.13   | 0.74         | 0.92   | 0.63         | 0.65   | 0.92         | 0.63   | 0.65         | 0.92   | 0.63         | 0.65   | 0.92         | 0.65   |

Supplementary Table 1: **Structural neuroretinal analysis using Optical Coherence Tomography (OCT) of the [BRI-LAP] cohort (rats with ocular hypertension in both eyes and brimonidine-Laponite formulation in the right eye) over 24 weeks.** RNFL: Retinal nerve fibre layer; GCL: Ganglion cell layer complex; thickness in microns ( $\mu\text{m}$ ); mean  $\pm$  SD (SD: standard deviation), %Ch: percentage change;  $p < 0.05$  statistical significance. Cells are coloured grey when the right eye treated with Bri-Lap formulation showed thicker sectors and/or lower percentage loss than the untreated hypertensive left eye. Upper cell: right eye. Lower cell: left eye.

| OCT PARAMETERS    | BASELINE       | p              | 2 w            | p              | 4 w            | p              | 6 w            | p               | 8 w            | p              | 12 w            | p              | 24 w           | p              |                |                |       |
|-------------------|----------------|----------------|----------------|----------------|----------------|----------------|----------------|-----------------|----------------|----------------|-----------------|----------------|----------------|----------------|----------------|----------------|-------|
| RETINAL THICKNESS | CENTRAL        |                | 285.25 ± 15.75 |                | 271.67 ± 12.22 |                | 271.33 ± 21.38 |                 | 265.05 ± 19.43 |                | 271.71 ± 11.22  |                | 265.22 ± 18.72 |                | 255.00 ± 18.17 |                |       |
|                   |                |                |                | <b>0.016</b>   |                | 0.375          |                | 0.965           |                | <b>0.003*</b>  |                 | 0.873          |                | 0.209          |                | 0.745          |       |
|                   |                | 274.52 ± 14.97 |                | 284.79 ± 25.79 |                | 266.62 ± 21.03 |                | 295.00 ± 10.29  |                | 278.00 ± 23.63 |                 | 247.67 ± 18.61 |                | 259.40 ± 15.27 |                |                |       |
|                   | INNER INFERIOR |                | 261.87 ± 9.96  |                | 261.67 ± 12.74 |                | 260.67 ± 4.50  |                 | 262.05 ± 10.05 |                | 256.71 ± 8.80   |                | 254.83 ± 9.19  |                | 245.00 ± 12.91 |                | 0.372 |
|                   |                |                |                | 0.616          |                | 0.824          |                | 0.382           |                | 0.302          |                 | 0.672          |                | 0.290          |                | 256.60 ± 14.63 |       |
|                   |                | 260.16 ± 15.09 |                | 262.85 ± 18.42 |                | 256.24 ± 10.77 |                | 270.20 ± 14.67  |                | 259.11 ± 11.33 |                 | 249.67 ± 5.85  |                |                |                |                |       |
|                   | OUTER INFERIOR |                | 251.29 ± 8.11  |                | 243.33 ± 17.61 |                | 244.33 ± 6.11  |                 | 261.18 ± 13.15 |                | 252.00 ± 9.52   |                | 251.06 ± 11.36 |                | 237.43 ± 11.74 |                | 0.570 |
|                   |                |                |                | 0.885          |                | 0.504          |                | 0.406           |                | 0.126          |                 | 0.560          |                | 0.130          |                | 241.20 ± 8.16  |       |
|                   |                | 251.68 ± 9.47  |                | 253.91 ± 16.81 |                | 247.67 ± 9.37  |                | 252.80 ± 9.33   |                | 250.11 ± 10.25 |                 | 242.00 ± 6.55  |                |                |                |                |       |
|                   | INNER SUPERIOR |                | 257.00 ± 6.55  |                | 261.00 ± 7.21  |                | 244.00 ± 4.35  |                 | 255.18 ± 15.56 |                | 262.71 ± 30.472 |                | 253.11 ± 23.62 |                | 240.86 ± 10.18 |                | 0.416 |
|                   |                |                |                | 0.158          |                | 0.345          |                | 0.965           |                | <b>0.031</b>   |                 | 0.056          |                | 0.056          |                | 238.60 ± 4.93  |       |
|                   |                | 253.84 ± 9.72  |                | 255.16 ± 19.27 |                | 245.62 ± 13.20 |                | 264.40 ± 6.95   |                | 243.00 ± 10.07 |                 | 235.33 ± 2.08  |                |                |                |                |       |
|                   | OUTER SUPERIOR |                | 255.00 ± 8.89  |                | 262.33 ± 6.50  |                | 245.00 ± 9.53  |                 | 264.18 ± 15.49 |                | 264.71 ± 21.46  |                | 260.44 ± 22.89 |                | 245.57 ± 15.61 |                | 0.744 |
|                   |                |                |                | 0.552          |                | 0.184          |                | 0.784           |                | 0.573          |                 | <b>0.042</b>   |                | 0.070          |                | 244.80 ± 3.96  |       |
|                   |                | 255.81 ± 7.58  |                | 254.44 ± 14.58 |                | 246.70 ± 10.94 |                | 258.00 ± 6.20   |                | 246.25 ± 12.95 |                 | 243.67 ± 4.72  |                |                |                |                |       |
|                   | INNER NASAL    |                | 258.67 ± 7.19  |                | 261.00 ± 8.18  |                | 250.00 ± 4.58  |                 | 255.64 ± 14.71 |                | 260.86 ± 16.487 |                | 254.39 ± 17.03 |                | 247.71 ± 17.28 |                | 0.088 |
|                   |                |                | 0.208          |                | 0.606          |                | 0.631          |                 | 0.223          |                | 0.289           |                | 0.290          |                | 243.40 ± 6.18  |                |       |
|                   | 256.77 ± 10.69 |                | 258.21 ± 15.89 |                | 248.05 ± 10.66 |                | 266.00 ± 9.67  |                 | 251.44 ± 13.72 |                | 245.00 ± 8.54   |                |                |                |                |                |       |
| OUTER NASAL       |                | 252.58 ± 7.93  |                | 253.67 ± 2.51  |                | 244.33 ± 6.65  |                | 258.95 ± 10.92  |                | 261.00 ± 17.16 |                 | 255.33 ± 18.95 |                | 250.00 ± 8.22  |                | <b>0.028</b>   |       |
|                   |                |                | 0.912          |                | 0.886          |                | 0.569          |                 | 0.454          |                | 0.167           |                | 0.650          |                | 240.40 ± 4.66  |                |       |
|                   | 252.06 ± 7.68  |                | 252.48 ± 11.66 |                | 247.71 ± 12.13 |                | 255.00 ± 9.61  |                 | 249.00 ± 10.95 |                | 251.00 ± 10.44  |                |                |                |                |                |       |
| INNER TEMPORAL    |                | 257.83 ± 10.08 |                | 259.00 ± 3.60  |                | 247.67 ± 4.61  |                | 257.91 ± 17.520 |                | 267.71 ± 34.70 |                 | 253.61 ± 22.14 |                | 248.29 ± 13.62 |                | 0.807          |       |
|                   |                |                | 0.439          |                | 0.731          |                | 0.570          |                 | 0.118          |                | 0.339           |                | 0.174          |                | 250.20 ± 5.80  |                |       |
|                   | 255.97 ± 10.97 |                | 255.76 ± 24.14 |                | 256.90 ± 31.49 |                | 265.80 ± 12.00 |                 | 250.67 ± 12.70 |                | 241.67 ± 7.50   |                |                |                |                |                |       |
| OUTER TEMPORAL    |                | 252.46 ± 7.51  |                | 253.00 ± 2.64  |                | 243.33 ± 7.50  |                | 265.91 ± 20.09  |                | 270.00 ± 30.82 |                 | 259.79 ± 24.88 |                | 252.00 ± 16.41 |                | 0.122          |       |
|                   |                |                | 0.508          |                | 0.932          |                | 0.406          |                 | 0.189          |                | <b>0.039</b>    |                | 0.118          |                | 243.60 ± 4.98  |                |       |
|                   | 253.87 ± 9.33  |                | 253.70 ± 12.76 |                | 249.67 ± 16.93 |                | 255.00 ± 7.31  |                 | 247.78 ± 9.71  |                | 243.67 ± 4.72   |                |                |                |                |                |       |

|                   |               |       |               |       |               |       |               |               |               |              |               |       |               |              |
|-------------------|---------------|-------|---------------|-------|---------------|-------|---------------|---------------|---------------|--------------|---------------|-------|---------------|--------------|
| TOTAL VOLUME      | 1.99 ± 0.02   |       | 1.82 ± 0.00   |       | 1.76 ± 0.05   |       | 1.84 ± 0.10   |               | 1.85 ± 0.13   |              | 1.81 ± 0.11   |       | 1.71 ± 0.16   |              |
|                   | 0.081         |       | 0.883         |       | 0.693         |       | 0.617         |               | 0.222         |              | 0.144         |       | 0.624         |              |
|                   | 1.96 ± 0.08   |       | 1.82 ± 0.10   |       | 1.76 ± 0.08   |       | 1.86 ± 0.05   |               | 1.77 ± 0.06   |              | 1.72 ± 0.03   |       | 1.73 ± 0.03   |              |
| GLOBAL            | 48.21 ± 3.79  |       | 47.67 ± 6.35  |       | 50.67 ± 7.76  |       | 43.23 ± 4.62  |               | 41.17 ± 3.76  |              | 43.15 ± 9.53  |       | 40.86 ± 4.22  |              |
|                   | 0.220         |       | 0.906         |       | 0.170         |       | 0.317         |               | 0.363         |              | 0.200         |       | 0.935         |              |
|                   | 46.97 ± 6.30  |       | 49.66 ± 11.63 |       | 44.20 ± 7.83  |       | 48.80 ± 11.38 |               | 48.88 ± 11.99 |              | 45.67 ± 2.51  |       | 43.00 ± 9.00  |              |
| INFERIOR TEMPORAL | 45.46 ± 7.12  |       | 46.00 ± 16.82 |       | 42.67 ± 3.21  |       | 45.68 ± 10.20 |               | 41.17 ± 5.07  |              | 41.80 ± 12.46 |       | 38.29 ± 4.46  |              |
|                   | 0.475         |       | 0.929         |       | 0.108         |       | 0.247         |               | <b>0.032</b>  |              | 0.156         |       | <b>0.034</b>  |              |
|                   | 47.87 ± 11.60 |       | 51.56 ± 15.04 |       | 52.05 ± 11.24 |       | 36.20 ± 15.30 |               | 54.43 ± 13.60 |              | 49.67 ± 5.68  |       | 45.40 ± 5.81  |              |
| INFERIOR NASAL    | 49.54 ± 7.12  |       | 52.67 ± 5.77  |       | 48.67 ± 1.52  |       | 46.50 ± 9.22  |               | 44.50 ± 6.53  |              | 45.10 ± 9.33  |       | 42.43 ± 8.77  |              |
|                   | 0.581         |       | 0.679         |       | 0.143         |       | 0.091         |               | <b>0.028</b>  |              | 0.100         |       | 0.626         |              |
|                   | 49.81 ± 11.23 |       | 52.22 ± 16.06 |       | 53.45 ± 11.78 |       | 35.20 ± 13.02 |               | 56.25 ± 9.45  |              | 56.67 ± 13.65 |       | 45.00 ± 10.07 |              |
| SUPERIOR TEMPORAL | 51.13 ± 8.17  |       | 54.67 ± 9.23  |       | 62.67 ± 14.74 |       | 37.81 ± 15.72 |               | 41.17 ± 13.81 |              | 43.60 ± 22.02 |       | 40.00 ± 12.66 |              |
|                   | 0.333         |       | 0.392         |       | <b>0.022</b>  |       | <b>0.007*</b> |               | 0.272         |              | 0.855         |       | 0.684         |              |
|                   | 49.48 ± 11.07 |       | 48.41 ± 17.33 |       | 35.35 ± 15.05 |       | 64.40 ± 22.78 |               | 36.62 ± 10.62 |              | 41.67 ± 17.78 |       | 41.20 ± 17.13 |              |
| SUPERIOR NASAL    | 43.71 ± 7.05  |       | 44.67 ± 7.23  |       | 56.00 ± 20.07 |       | 32.55 ± 14.37 |               | 28.00 ± 10.65 |              | 33.55 ± 22.62 |       | 35.57 ± 8.65  |              |
|                   | 0.381         |       | 0.637         |       | <b>0.045</b>  |       | <b>0.039</b>  |               | 0.517         |              | 0.784         |       | 0.569         |              |
|                   | 40.48 ± 8.69  |       | 41.72 ± 15.08 |       | 31.50 ± 14.00 |       | 45.80 ± 7.46  |               | 35.50 ± 13.69 |              | 29.33 ± 18.23 |       | 33.80 ± 12.57 |              |
| NASAL             | 46.50 ± 7.15  |       | 46.67 ± 5.03  |       | 43.67 ± 2.30  |       | 44.32 ± 8.15  |               | 43.00 ± 3.89  |              | 43.15 ± 8.52  |       | 43.29 ± 3.54  |              |
|                   | 0.284         |       | 0.616         |       | 0.964         |       | <b>0.042</b>  |               | 0.438         |              | 0.292         |       | 0.289         |              |
|                   | 45.26 ± 8.44  |       | 46.22 ± 13.99 |       | 43.50 ± 9.76  |       | 37.40 ± 4.50  |               | 45.13 ± 10.19 |              | 46.00 ± 5.19  |       | 43.20 ± 10.47 |              |
| TEMPORAL          | 51.29 ± 8.73  |       | 43.67 ± 8.02  |       | 53.00 ± 15.71 |       | 46.68 ± 10.46 |               | 44.17 ± 7.78  |              | 47.40 ± 12.04 |       | 42.43 ± 8.03  |              |
|                   | 0.158         |       | 0.136         |       | 0.583         |       | <b>0.029</b>  |               | 0.174         |              | 0.409         |       | 0.328         |              |
|                   | 48.84 ± 9.75  |       | 53.19 ± 12.20 |       | 47.10 ± 11.15 |       | 67.20 ± 26.16 |               | 55.75 ± 20.56 |              | 48.00 ± 3.00  |       | 46.40 ± 7.19  |              |
| CENTRAL           | 22.33 ± 2.29  |       | 22.00 ± 3.00  |       | 20.67 ± 1.52  |       | 17.45 ± 3.15  |               | 19.86 ± 4.01  |              | 16.78 ± 3.59  |       | 15.57 ± 3.78  |              |
|                   | 0.959         |       | 0.314         |       | 0.186         |       | <b>0.002*</b> |               | 0.708         |              | 0.879         |       | 0.462         |              |
|                   | 22.13 ± 2.70  |       | 20.03 ± 3.33  |       | 18.57 ± 2.67  |       | 25.00 ± 4.52  |               | 18.67 ± 3.12  |              | 17.00 ± 2.64  |       | 17.20 ± 1.92  |              |
| INNER INFERIOR    | 28.00 ± 2.10  | 0.455 | 24.00 ± 3.00  | 0.399 | 25.67 ± 0.57  | 0.565 | 23.41 ± 4.42  | <b>0.002*</b> | 26.86 ± 2.54  | <b>0.021</b> | 23.50 ± 4.79  | 0.919 | 21.57 ± 5.59  | <b>0.038</b> |

|                |              |       |               |        |              |       |              |        |              |       |              |       |              |
|----------------|--------------|-------|---------------|--------|--------------|-------|--------------|--------|--------------|-------|--------------|-------|--------------|
|                | 28.16 ± 2.36 |       | 25.59 ± 2.97  |        | 24.57 ± 3.64 |       | 29.80 ± 2.16 |        | 23.89 ± 2.31 |       | 24.67 ± 0.57 |       | 25.60 ± 1.67 |
| OUTER INFERIOR | 26.46 ± 2.16 | 0.808 | 26.00 ± 2.64  | 0.312  | 24.67 ± 2.08 | 0.538 | 24.41 ± 4.59 | 0.156  | 27.71 ± 4.19 | 0.087 | 24.44 ± 4.09 | 0.136 | 22.14 ± 6.28 |
|                | 26.61 ± 1.72 |       | 24.47 ± 2.33  |        | 24.05 ± 2.81 |       | 27.00 ± 1.73 |        | 24.22 ± 2.38 |       | 22.33 ± 1.52 |       | 24.20 ± 1.92 |
| INNER SUPERIOR | 26.92 ± 1.74 | 0.356 | 26.33 ± 2.309 | 0.085  | 23.00 ± 1.73 | 0.253 | 22.59 ± 3.37 | 0.009* | 21.57 ± 4.72 | 0.447 | 21.50 ± 4.50 | 0.959 | 17.57 ± 4.92 |
|                | 26.45 ± 1.71 |       | 23.34 ± 3.71  |        | 20.76 ± 3.17 |       | 27.20 ± 2.38 |        | 21.50 ± 2.39 |       | 21.33 ± 0.57 |       | 20.80 ± 2.49 |
| OUTER SUPERIOR | 25.83 ± 2.37 | 0.979 | 26.33 ± 2.30  | 0.129  | 23.00 ± 3.46 | 0.782 | 24.77 ± 2.81 | 0.179  | 21.71 ± 4.11 | 0.771 | 22.44 ± 3.60 | 0.919 | 20.14 ± 5.64 |
|                | 25.74 ± 1.98 |       | 23.69 ± 3.17  |        | 21.70 ± 3.32 |       | 26.40 ± 1.14 |        | 22.88 ± 2.10 |       | 22.67 ± 1.15 |       | 24.40 ± 3.50 |
| INNER NASAL    | 26.50 ± 2.16 | 0.199 | 24.00 ± 1.00  | 0.421  | 20.67 ± 4.04 | 0.455 | 21.32 ± 5.05 | 0.124  | 23.14 ± 2.19 | 0.873 | 21.56 ± 5.05 | 0.578 | 19.57 ± 5.31 |
|                | 25.65 ± 2.61 |       | 21.64 ± 4.22  |        | 22.48 ± 2.82 |       | 25.00 ± 3.00 |        | 22.44 ± 3.74 |       | 21.00 ± 2.64 |       | 23.00 ± 1.58 |
| OUTER NASAL    | 26.71 ± 2.38 | 0.154 | 26.33 ± 0.57  | 0.013* | 24.00 ± 3.00 | 0.660 | 23.38 ± 5.50 | 0.647  | 25.29 ± 1.70 | 0.197 | 22.00 ± 6.29 | 0.880 | 22.00 ± 1.78 |
|                | 26.00 ± 2.25 |       | 22.06 ± 3.11  |        | 23.48 ± 2.90 |       | 25.60 ± 2.07 |        | 24.00 ± 2.23 |       | 22.67 ± 3.21 |       | 23.40 ± 1.34 |
| INNER TEMPORAL | 26.92 ± 1.97 | 0.346 | 23.33 ± 2.51  | 0.666  | 23.33 ± 2.88 | 0.510 | 21.23 ± 5.05 | 0.167  | 23.43 ± 6.24 | 0.390 | 20.89 ± 5.31 | 0.085 | 18.71 ± 4.92 |
|                | 25.68 ± 3.93 |       | 22.12 ± 3.96  |        | 22.19 ± 3.57 |       | 24.20 ± 2.95 |        | 21.78 ± 3.23 |       | 25.00 ± 3.60 |       | 21.80 ± 1.92 |
| OUTER TEMPORAL | 27.17 ± 1.40 | 0.452 | 24.67 ± 2.51  | 0.505  | 24.67 ± 2.88 | 0.510 | 24.41 ± 4.80 | 0.825  | 25.00 ± 4.50 | 0.068 | 25.00 ± 5.16 | 0.838 | 20.43 ± 5.28 |
|                | 26.61 ± 2.90 |       | 23.36 ± 3.00  |        | 23.24 ± 2.87 |       | 24.40 ± 3.20 |        | 23.22 ± 2.33 |       | 25.67 ± 4.04 |       | 24.80 ± 1.78 |
| TOTAL VOLUME   | 0.18 ± 0.01  | 0.187 | 0.17 ± 0.00   | 0.153  | 0.16 ± 0.01  | 0.399 | 0.12 ± 0.07  | 0.039  | 0.14 ± 0.06  | 0.721 | 0.08 ± 0.08  | 0.175 | 0.13 ± 0.03  |
|                | 0.18 ± 0.01  |       | 0.16 ± 0.01   |        | 0.15 ± 0.01  |       | 0.18 ± 0.01  |        | 0.16 ± 0.01  |       | 0.16 ± 0.01  |       | 0.16 ± 0.01  |

Supplementary Table 2: Structural neuroretinal analysis using Optical Coherence Tomography (OCT). Comparison between the [non-bri] cohort (rats with ocular hypertension in the right eye) and the [BRI-LAP] cohort (rats with ocular hypertension in both eyes and brimonidine-Laponite formulation in the right eye) over 24 weeks. RNFL: Retinal nerve fibre layer; GCL: Ganglion

cell layer complex; thickness in microns ( $\mu\text{m}$ ); mean  $\pm$  SD (SD: standard deviation), %Ch: percentage change;  $p < 0.05$  statistical significance; \* $p < 0.020$  statistical significance with Bonferroni correction for multiple comparisons. Cells are coloured grey when the right eye treated with Bri-Lap formulation in the [BRI-LAP] cohort showed thicker sectors and/or lower percentage loss than the untreated hypertensive right eye from the [non-bri] cohort. Upper cell: [non-bri] cohort. Lower cell: [BRI-LAP] cohort.
