# Supplementary material for: Brimonidine-LAPONITE® intravitreal formulation has an ocular hypotensive and neuroprotective effect throughout 6 months of follow-up in a glaucoma animal model
Source: Royal Society of Chemistry journal article supplement (doi:10.1039/d0bm01013h), 2020-01-01
Supplement: d0bm01013h2.pdf [file d0bm01013h2.pdf]

Supplementary video legend: **Degradation of the Bri-Lap formulation over the 6-month study is observed in vitreous OCT as hyperreflective white dots.** The images were extracted using the en face vitreous protocol from a representative rat from the [BRI-LAP] cohort in which the Bri-Lap formulation was injected into the vitreous body (right eye).
